# Supplementary material for: A programmable platform for sub-second multichemical dynamic stimulation and neuronal functional imaging inC. elegans
Source: Royal Society of Chemistry journal article supplement (doi:10.1039/c7lc01116d), 2017-12-21
Supplement: c7lc01116d1.pdf [file c7lc01116d1.pdf]

Supplemental Information

| $R_2 / R_1$ | Max $\Delta P$ to achieve stream selection | Functionality                 |
|-------------|--------------------------------------------|-------------------------------|
| 1.8         | 0.4                                        | Stage 1 too sensitive         |
| <b>7.8</b>  | <b>0.6</b>                                 | <b>Good</b>                   |
| 13          | 1.8                                        | Vortices occurring at Stage 1 |

| $R_3 / R_2$ | Primary stream refresh time (ms) | Secondary stream refresh time (ms) | Functionality                                  |
|-------------|----------------------------------|------------------------------------|------------------------------------------------|
| 0.03        | 55                               | 200                                | Stage 2 too sensitive                          |
| <b>0.06</b> | <b>70</b>                        | <b>140</b>                         | <b>Switching frequency possible up to 4 Hz</b> |
| 0.1         | 130                              | 450                                | Switching frequency possible up to 2 Hz        |

Device characteristics

|                             |          |                        |
|-----------------------------|----------|------------------------|
| $R_1$                       | 6.9 E+12 | kg/(m <sup>4</sup> /s) |
| $R_2$                       | 5.3 E+13 | kg/(m <sup>4</sup> /s) |
| $R_3$                       | 3.2 E+12 | kg/(m <sup>4</sup> /s) |
| Upstream outlet flow rate   | 840      | μL/min                 |
| Downstream outlet flow rate | 70       | μL/min                 |
| Velocity at worm's nose     | 55       | mm/s                   |
| Flow rate at worm's nose    | 35       | μL/min                 |
| Switching time              | 60       | ms                     |

Table S.1: Influence of the ratio of resistances  $R_2/R_1$  over stream selection at Stage 1. “ $\Delta P$  to achieve stream selection” refers to the maximum difference in pressure between all inlets leading to selection chemicals.

Table S.2: Influence of the ratio of resistances  $R_3/R_2$  over stream selection at Stage 2 and switching frequency. Primary streams refers to the stream pushed over the worm's nose and secondary stream refers to the stream diverted away from the worm's nose.

Table S.3: Device characteristics. Resistance values  $R_1$ ,  $R_2$ , and  $R_3$  were calculated based on the channel geometry. All other parameters were measured while operating the device with inlet pressures around 5 psi.

Supplementary Video 1: Video showing delivery of a 2Hz stimulus sequence to an immobilized worm. Stimulus streams are labelled with food dyes. The field of view is located at Stage 2 of the device, with the upper stages and inlets located in the downward direction.

Supplementary Video 2: Video of a single animal from Fig. 6 experiment demonstrating ASH neuronal activity to repetitive stimulation of either 1M glycerol or .5M NaCl. Each stimulus pulse duration is 10s. The leftmost panel shows an immobilized worm with its nose pointed towards the right into the stimulus channel. The upper-right panel displays the neuronal activity of the ASH neuron over time. The bottom-right panel displays the driving stimulus signal as quantified by average fluorescence intensity at the worm's nose. Video playback is sped up 5x.

## System Design and Assembly

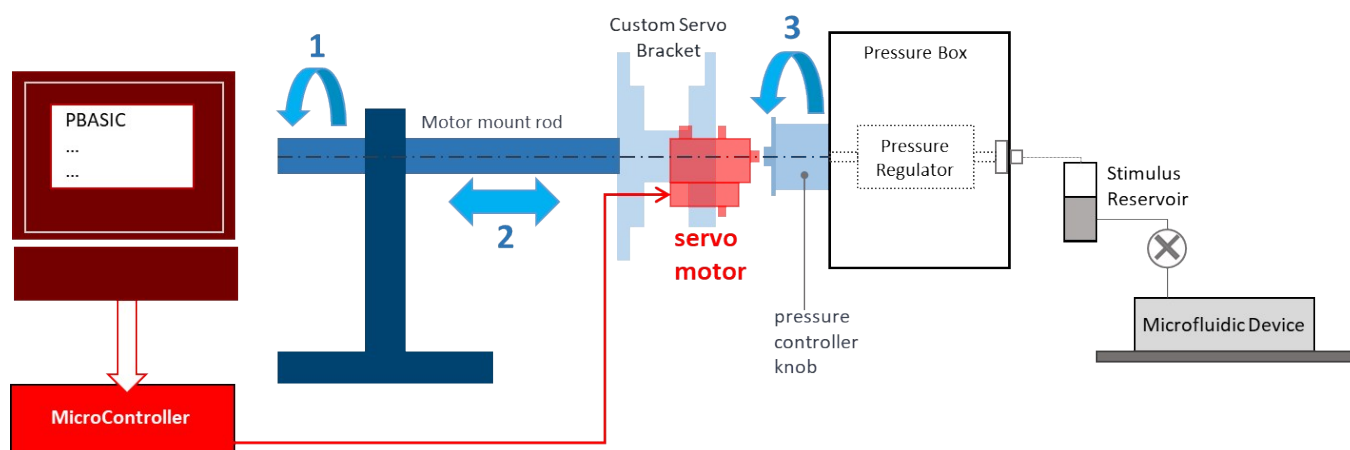

Figure SI 1: Schematics of the experimental system for automating one line of pressure control.

### List of components to set up the pressure control of the platform:

- Computer software (BASIC Stamp Editor Software)
- Microcontroller (BASIC Stamp II Educational Board, Parallax Inc.)
- Servo motor (LS-0009AF, Metal Gear Digital) x4
- Motor mount (custom-made) x4
- Pressure-box

**Assembly:** Servo horn was glued to the regulator knob of the pressure box. Motor was aligned to fit to the horn via the custom servo mount with rotational and translational freedom (arrows 1 and 2 on Fig. SI1). To achieve rapid, automated pressure regulation, servo motors were mounted axially on optical assembly rods, and the entire motor assembly could be rapidly and reversibly engaged and disengaged to the pressure regulator knob, allowing for manual alignment (arrow 3 on Fig. SI1). After which, commands sent via PC to the microcontroller enable rapid and precise rotations of the servo motor to adjust the rotation of the regulator knob.

The resulting platform design is generic and fairly cheap. Various types of servo motors, microcontrollers, pressure regulators, and mounting methods can be substituted to achieve a working, in-house pressure control design to work with the microfluidic device. Also, commercial products that offer flow control for pressure-driven flow in microfluidics should work with the design.

**System Calibration and Imaging Workflow:** Calibration starts with adjusting manually the pressure so that the stimulus streams contribute equally to the total flow fraction. Then, servo motors are set to the home position using commands via the microcontroller (the servo motors used here, chosen for speed, rotate  $\pm 45$  degrees from the home position). Finally, the servo motors are locked to the pressure knobs. Calibration is only needed for initial setup. Tens of animals can be successively assayed without requiring any re-calibration.
